# Supplementary material for: Water regime and osmotic adjustment under warming conditions on wheat in the Yaqui Valley, Mexico
Source: PeerJ. 2019 Jun 12;7:e7029. doi: 10.7717/peerj.7029 (PMC6570998; doi:10.7717/peerj.7029)
Supplement: Supplemental Information 1 — Water and osmotic potential, osmotic adjustment, transpiration and Proline, GB and RG contents raw data. [file peerj-07-7029-s001.xlsx]

## Sheet: Hoja1
	Water regime article
	Water, omotic potential and osmotic adjustment database
		Phenophase	Organ	Rep	Wp Control	Wp Warming	Op Control	Op Warming	OA
		Growing	Roots	1	-0.5	-0.7	-0.6	-0.9	0.3
		Growing	Roots	2	-0.52	-0.71	-0.62	-0.91	0.29
		Growing	Roots	3	-0.51	-0.72	-0.61	-0.92	0.31
		Growing	Leaves	1	-0.73	-0.81	-0.81	-0.91	0.1
		Growing	Leaves	2	-0.73	-0.82	-0.82	-0.9	0.08
		Growing	Leaves	3	-0.74	-0.81	-0.8	-0.913	0.113
		Tillering	Roots	1	-0.83	-1.1	-0.9	-1.3	0.4
		Tillering	Roots	2	-0.82	-1.12	-0.91	-1.31	0.4
		Tillering	Roots	3	-0.83	-1.1	-0.912	-1.312	0.4
		Tillering	Leaves	1	-0.91	-1.1	-1.11	-1.31	0.2
		Tillering	Leaves	2	-0.92	-1.12	-1.1	-1.3	0.2
		Tillering	Leaves	3	-0.921	-1.13	-1.112	-1.32	0.208
		Heading	Roots	1	-0.94	-1.14	-1.012	-1.341	0.329
		Heading	Roots	2	-0.93	-1.15	-1	-1.34	0.34
		Heading	Roots	3	-0.95	-1.16	-1.012	-1.3421	0.3301
		Heading	Leaves	1	-1.12	-1.2	-1.11	-1.3611	0.2511
		Heading	Leaves	2	-1.11	-1.23	-1.112	-1.3612	0.2492
		Heading	Leaves	3	-1.13	-1.22	-1.113	-1.3613	0.2483

## Sheet: Hoja2
	Transpiration database
		Phenophases	Treatment	Repetition	Transpiration
		Growing	Control	1	2.98
		Growing	Control	2	3.11
		Growing	Control	3	3.01
		Growing	Warming	1	3.18
		Growing	Warming	2	3.19
		Growing	Warming	3	3.21
		Tillering	Control	1	4.38
		Tillering	Control	2	4.382
		Tillering	Control	3	4.381
		Tillering	Warming	1	4.53
		Tillering	Warming	2	4.532
		Tillering	Warming	3	4.534
		Heading	Control	1	4.53
		Heading	Control	2	4.532
		Heading	Control	3	4.534
		Heading	Warming	1	5.61
		Heading	Warming	2	5.621
		Heading	Warming	3	5.623

## Sheet: Hoja3
	Proline, GB and RG and its correlation with AO database
		Phenophase	TREATMENT	Rep	PRO	GB	GR	OA
		Growth	Warming	1	48.7	19.4	11.45	0.3
		Growth	Warming	2	48.8	18.9	11.46	0.29
		Growth	Warming	3	48.6	19.3	11.47	0.31
		Growth	Control	1	14.2	10.8	7.65	0.1
		Growth	Control	2	14.2	10.3	7.64	0.08
		Growth	Control	3	14.1	10.7	7.63	0.113
		Tillering	Warming	1	64.1	23.2	18.36	0.4
		Tillering	Warming	2	63.8	24	18.35	0.4
		Tillering	Warming	3	63.4	24.1	18.36	0.4
		Tillering	Control	1	14.5	11.4	8.13	0.2
		Tillering	Control	2	16.1	11.6	8.13	0.2
		Tillering	Control	3	14.2	10.8	8.12	0.208
		Heading	Warming	1	86.5	29.4	21.4	0.329
		Heading	Warming	2	87.2	29.6	21.9	0.34
		Heading	Warming	3	89.8	29	21.8	0.3301
		Heading	Control	1	27.5	14.9	10.2	0.2511
		Heading	Control	2	27.3	14.7	10.3	0.2492
		Heading	Control	3	28.1	14.5	10.2	0.2483
